# Supplementary material for: Recommended survey designs for occupancy modelling using motion-activated cameras: insights from empirical wildlife data
Source: PeerJ. 2014 Aug 28;2:e532. doi: 10.7717/peerj.532 (PMC4157302; doi:10.7717/peerj.532)
Supplement: Table S3 — The spreadsheet allows the financial costs of different scenarios to be calculated depending upon the cost of each camera and occasion (e.g., field costs incurred per day for each camera). [file peerj-02-532-s003.xlsx]

## Sheet: p-start
Species	p-hat
Bobcat	0.04
Coyote	0.031
Mountain Lion	0.03
Elk	0.024
Spotted Skunk	0.023
Raccoon	0.003
Black Bear	0.072
Grey Fox	0.063
Mule Deer	0.141
Cottaintail Rabbit	0.19
Virtual 2	0.12
Virtual 3	0.16
Virtual 1	0.12
	Sample Occs	10	20	30	40	50	60	70	80	100	120
	Bobcat	0.335167	0.557998	0.706142	0.804634	0.870114	0.913648	0.94259	0.961832	0.98313	0.992543
	Coyote	0.270143	0.467309	0.611212	0.71624	0.792896	0.848844	0.889677	0.91948	0.957108	0.977152
	Mountain Lion	0.262576	0.456206	0.598993	0.704288	0.781935	0.839193	0.881417	0.912554	0.952447	0.974141
	Elk	0.215671	0.384828	0.517503	0.621564	0.703182	0.767197	0.817406	0.856786	0.911899	0.945803
	Spotted Skunk	0.207598	0.372099	0.50245	0.60574	0.687588	0.752444	0.803836	0.844559	0.902399	0.938716
	Raccoon	0.0295982	0.0583204	0.0861924	0.11324	0.139486	0.164956	0.189672	0.213656	0.259516	0.302701
	Black Bear	0.526326	0.775633	0.893723	0.949659	0.976155	0.988705	0.99465	0.997466	0.999431	0.999872											These values are of p*.
	Grey Fox	0.47833	0.72786	0.858033	0.92594	0.961365	0.979845	0.989486	0.994515	0.998507	0.999594											red highlighted values where p* is greater than 0.9
	Mule Deer	0.781258	0.952152	0.989534	0.997711	0.999499	0.99989	0.999976	0.999995	1	1
	Cottaintail Rabbit	0.878423	0.985219	0.998203	0.999782	0.999973	0.999997	1	1	1	1
	Virtual 2	0.721499	0.922437	0.978399	0.993984	0.998325	0.999533	0.99987	0.999964	0.999997	1											Notice that at scenarios where p* is > 0.9 then there is not much advantage to
	Virtual 3	0.825099	0.96941	0.99465	0.999064	0.999836	0.999971	0.999995	0.999999	1	1											increasing the number of occasions. The Figure 4 lines start getting very flat going from left to right on the x-axis.
	Virtual 1	0.721499	0.922437	0.978399	0.993984	0.998325	0.999533	0.99987	0.999964	0.999997	1

## Sheet: cost function
Number of Cameras	Cost of Purchasing Cameras($)	Cost of Purchasing Cameras($)
0	0	100
1	450	100
2	900	100
3	1350	100
4	1800	100
5	2250	100
6	2700	100
7	3150	100
8	3600	100
9	4050	100
10	4500	100
11	4950	100
12	5400	100						Assuming 1 person can deploy 10 cameras per day
13	5850	100						1 person costs $100/day
14	6300	100
15	6750	100
16	7200	100
17	7650	100			IGNORE THIS
18	8100	100			THIS IS ANNOYING
19	8550	100
20	9000	100
21	9450	100
22	9900	100
23	10350	100
24	10800	100
25	11250	100
26	11700	100
27	12150	100
28	12600	100
29	13050	100
30	13500	100
31	13950	100
32	14400	100
33	14850	100
34	15300	100
35	15750	100
36	16200	100
37	16650	100
38	17100	100
39	17550	100
40	18000	100
41	18450	100
42	18900	100
43	19350	100
44	19800	100
45	20250	100
46	20700	100
47	21150	100
48	21600	100
49	22050	100
50	22500	100
51	22950	200
52	23400	1.04
53	23850	1.06
54	24300	1.08
55	24750	1.1
56	25200	1.12
57	25650	1.14
58	26100	1.16
59	26550	1.18
60	27000	1.2
61	27450	1.22
62	27900	1.24
63	28350	1.26
64	28800
65	29250
66	29700
67	30150
68	30600
69	31050
70	31500
71	31950
72	32400
73	32850
74	33300
75	33750
76	34200
77	34650
78	35100
79	35550
80	36000
81	36450
82	36900
83	37350
84	37800
85	38250
86	38700
87	39150
88	39600
89	40050
90	40500
91	40950
92	41400
93	41850
94	42300
95	42750
96	43200
97	43650
98	44100
99	44550
100	45000
101	45450
102	45900
103	46350
104	46800
105	47250
106	47700
107	48150
108	48600
109	49050
110	49500
111	49950
112	50400
113	50850
114	51300
115	51750
116	52200
117	52650
118	53100
119	53550
120	54000

## Sheet: detecting rare species
Seems like you should be able to come up with an expression for this using the occupancy paramters...for example: the probability of
detecting a species at a given camera is psi×p*, thus the probability of not detecting it at a camera is (1-( psi×p*)). The probability of detecting it at at
least one camera should be 1-(1-(psi×p*))^N, where N is the number of cameras. p* will be a function of the number of occasions (days).
PSI	p	Occs	P-star	Cameras				cameras cost $400
0.05	0.05	20	0.641514	10				Surveys cost $100 for every 20 days
								You want at least a 95% prob of detecting species at one site
		Prob Detection	Prob Not detecting	Prob Detecting at least once at one camera
		0.0320757	0.967924	0.278205

## Sheet: Survey cost tool
When considering the trade-offs between the number of cameras to buy (# of sites to survey) and the number of sampling occasions, one should consider the expected error (i.e, RMSE) of estimating occupancy for a given species, but also the financial costs. While certain survey designs may be desirable due to their low expected RMSE, not all are financially achievable. The spreadsheet can be used t…
					Sites
		10	20	30	40	50	60	70	80	120
Occasions	20	2700	5200	7700	10200	12700	15200	17700	20200	30200			Cost per camera	250
	40	2900	5400	7900	10400	12900	15400	17900	20400	30400
	60	3100	5600	8100	10600	13100	15600	18100	20600	30600			Cost per occasion	10
	80	3300	5800	8300	10800	13300	15800	18300	20800	30800
	100	3500	6000	8500	11000	13500	16000	18500	21000	31000
	120	3700	6200	8700	11200	13700	16200	18700	21200	31200
